# Supplementary material for: Training the Trainers in Ultrasound-guided Access to Improve Peripheral Intravenous Catheter Placement among Children Presenting for Anesthesia
Source: PubMed Central journal article supplement (PMC8104256; doi:10.1097/pq9.0000000000000406), 2021-05-05
Supplement: pqs-6-e406-s001.pdf [file pqs-6-e406-s001.pdf]

**SDC Table 1:** Results of a pre-survey prior to an ultrasound-guided IV workshop grouped by years of experience showing number of attending anesthesiologists reporting (a) ultrasound use at least once per week, (b) frequency of ultrasound use for peripheral IV, (c) average aggregate self-described expertise (scale: 0-100; higher rating for greater expertise) with ultrasound-guided IV placement.

| Years experience | <i>I don't use an ultrasound for PIV. Use an ultrasound at least once per week</i> |              |            |            | Self-Reported Level of Expertise median (interquartile range) |
|------------------|------------------------------------------------------------------------------------|--------------|------------|------------|---------------------------------------------------------------|
|                  | <i>Disagree</i>                                                                    | <i>Agree</i> | <i>No</i>  | <i>Yes</i> |                                                               |
| < 3              | 9 (100%)                                                                           | 0 (0%)       | 4 (44.4%)  | 5 (55.6%)  | 66 (50-72)                                                    |
| 3 to 5           | 3 (75%)                                                                            | 1 (25%)      | 3 (75%)    | 1 (25%)    | 43 (39-51)                                                    |
| 5 to 10          | 14 (82.4%)                                                                         | 3 (17.6%)    | 11 (64.7%) | 6 (36.3%)  | 50 (22-75)                                                    |
| 10 to 15         | 8 (61.5%)                                                                          | 5 (38.5%)    | 10 (76.9%) | 3 (23.1%)  | 30 (1-50)                                                     |
| > 15             | 8 (66.7%)                                                                          | 4 (33.3%)    | 9 (75%)    | 3 (25%)    | 23.5 (0-53)                                                   |

**SDC Table 2:** Results of a pre-survey prior to an ultrasound guided IV workshop showing number of peripheral IV attempts before calling for ultrasound.

| Number of Attempts Before Calling for Ultrasound | Number of Respondents |
|--------------------------------------------------|-----------------------|
| 0                                                | 3 (5.5%)              |
| 1                                                | 2 (3.6%)              |
| 2                                                | 11 (20.0%)            |
| 3                                                | 19 (34.5%)            |
| 4                                                | 5 (9.1%)              |
| 5                                                | 2 (3.6%)              |
| 6                                                | 1 (1.8%)              |
| I don't use ultrasound                           | 12 (21.8%)            |

**SDC Table 3:** Multivariable logistic regression model demonstrating the adjusted association of the training and post-intervention periods with reduced odds of a case requiring more than 3 attempts at peripheral IV.

|                            | <i>Odds Ratio Estimate (95% CI)</i> | <i>p-value</i>  |
|----------------------------|-------------------------------------|-----------------|
| Training (v Pre)           | 0.68 (0.57 - 0.8)                   | 1.26E-05        |
| Post Intervention (vs Pre) | 0.66 (0.55 - 0.79)                  | 5.54E-06        |
| < 30 days (vs 16+)         | 3.83 (1.25 - 9.6)                   | 0.008417939737  |
| 1-3 months (vs 16+)        | 6.31 (3.91 - 10.32)                 | 9.22E-14        |
| 4-6 months (vs 16+)        | 8.84 (5.76 - 13.88)                 | 2.01E-22        |
| 7-9 months (vs 16+)        | 9.71 (6.34 - 15.22)                 | 2.02E-24        |
| 10-11 months (vs 16+)      | 7.92 (4.94 - 12.86)                 | 1.92E-17        |
| 12-23 months (vs 16+)      | 5.93 (3.98 - 9.08)                  | 2.07E-17        |
| 2-4 years (vs 16+)         | 2.77 (1.86 - 4.23)                  | 1.06E-06        |
| 5-7 years (vs 16+)         | 0.91 (0.57 - 1.46)                  | 0.6778299128    |
| 8-10 years (vs 16+)        | 0.57 (0.34 - 0.94)                  | 0.02821761346   |
| 11-15 years (vs 16+)       | 0.82 (0.54 - 1.27)                  | 0.3621689383    |
| BMI < 15 (vs 20-30)        | 0.55 (0.41 - 0.75)                  | 0.0001272616517 |
| BMI 15-20 (vs 20-30)       | 0.64 (0.52 - 0.79)                  | 3.84E-05        |
| BMI 30-35 (vs 20-30)       | 1.31 (0.61 - 2.48)                  | 0.4470657884    |
| BMI > 15 (vs 20-30)        | 2.49 (1.23 - 4.56)                  | 0.005890744969  |
| ASA-PS 2 (vs 1)            | 1.11 (0.9 - 1.36)                   | 0.3381611225    |
| ASA-PS 3 (vs 1)            | 2.53 (2.08 - 3.09)                  | 2.33E-20        |
| ASA-PS 4 (vs 1)            | 2.23 (1.58 - 3.12)                  | 3.59E-06        |

Increasing BMI and increasing ASA-PS were associated with a greater risk of requiring greater than 3 attempts. Hosmer-Lemeshow test ( $g = 19$ ,  $p = 0.259$ ) showed no evidence of poor fit; c-statistic (ROC-AUC) = 0.773.
